# Supplementary material for: NLRP1 inflammasome drives IL-18 in Familial Mediterranean Fever and MEFV variants
Source: Research Square preprint supplement (doi:10.21203/rs.3.rs-7037096/v1), 2025-12-22
Supplement: Supplementary file 1 [file e980265999626c015211256d.pdf]

Supplementary Data

**NLRP1 inflammasome drives IL-18 in Familial Mediterranean Fever and MEFV variants**

Juan Miguel Suarez-Rivero<sup>1</sup>, Inés Muela-Zarzuela<sup>1</sup>, Daniel Boy-Ruiz<sup>1</sup>, Raquel de la Varga-Martínez<sup>2</sup>, Daniel García-Cuesta<sup>2</sup>, Mario D. Cordero<sup>1,3</sup>

<sup>1</sup> Department of Molecular Biology and Biochemical Engineering, Universidad Pablo de Olavide, 41013 Seville, Spain.

<sup>2</sup> Department of Immunology, Puerta del Mar Hospital, 11009 Cádiz, Spain.

<sup>3</sup> CIBER de Enfermedades Respiratorias (CIBERES), Instituto de Salud Carlos III, Madrid, Spain.

**Running Title:** NLRP1 is associated with MEFV

**Corresponding Author:**

Dr. Mario D. Cordero

Department of Molecular Biology and Biochemical Engineering, Universidad Pablo de Olavide, 41013 Seville, Spain. Email: mdcormor1@upo.es.

**Table 1.** Clinical characteristic and mutations in MEFV patients.

| Case | Age | Sex    | Mutation                                          | Clinical presentation                                                                                                                                                | Treatment                                                                                                                |
|------|-----|--------|---------------------------------------------------|----------------------------------------------------------------------------------------------------------------------------------------------------------------------|--------------------------------------------------------------------------------------------------------------------------|
| 1    | 13  | Male   | c.383_391dupAGGGGAACG<br>(p.Glu128_Asn130dup)     | Fever (41°C max.),<br>abdominal pain, oral<br>aphthous, pharyngitis,<br>headache, inflamed<br>eyelid, psoriasis plaques                                              | Paracetamol,<br>ibuprofen,<br>amoxicillin,<br>stilsone, colchicine<br>1 mg/12h                                           |
| 2    | 49  | Female | c.383_391dupAGGGGAACG<br>(p.Glu128_Asn130dup)     | Abdominal pain, fever<br>(37,5°C max.),<br>arthralgia, myalgia                                                                                                       | Colchicine 500<br>mcg/24h                                                                                                |
| 3    | 32  | Female | p.Gly632Ser<br>Heterozygote                       | Abdominal pain, fever<br>(37,5°C max.),<br>arthralgia, myalgia, oral<br>aphthous                                                                                     | Paracetamol,<br>metamizol,<br>colchicine 500<br>mg/12h                                                                   |
| 4    | 16  | Female | p.Met694Val<br>Heterozygote                       | EBV infection, familial<br>haemophagocytic<br>lymphohistiocytosis,<br>asthenia, nausea, fever<br>(39°C máx.), arthralgia,<br>myalgia, pharyngitis,<br>abdominal pain | Metamizol, septrin<br>forte,<br>dexamethasone 1<br>mg/12h,<br>Intravenous<br>immunoglobulin,<br>rituximab 550<br>mg/week |
| 5    | 6   | Male   | p.Glu148Gln Homozygote<br>p.Pro369Ser/p.Arg408Gln | Abdominal pain,<br>diarrhea, fever (39,8°C                                                                                                                           | Ibuprofen,<br>ciprofloxacin,                                                                                             |

|   |    |        |                                                     |                                                                                                                     |                                                                     |
|---|----|--------|-----------------------------------------------------|---------------------------------------------------------------------------------------------------------------------|---------------------------------------------------------------------|
|   |    |        |                                                     | max.), arthralgia, oral aphthous, pharyngitis, dactylitis, blepharitis, suppurative otitis                          | stilsone, colchicine<br>500 mcg/24h                                 |
| 6 | 31 | Female | p.Glu148Gln Heterozygote<br>p.Pro369Ser/p.Arg408Gln | Abdominal pain, chest pain, arthralgia, fever (37,5°C max.), global rash                                            | Prednisone,<br>colchicine 1,5 mg/24h,<br>tocilizumab sc 162 mg/week |
| 7 | 50 | Male   | p.Met694Val Homozygote                              | Abdominal pain, fever (37,5°C max.), arthralgia, myalgia                                                            | Ibuprofen,<br>Colchicine 2 mg/12h                                   |
| 8 | 9  | Male   | p.Pro369Ser/p.Arg408Gln                             | Abdominal pain, arthralgia, fever (40°C max.), global rash, pharyngitis, oral aphthous, conjunctivitis, blepharitis | Stilsone, colchicine<br>500 mcg/12h,<br>anakinra 150 mg sc/24h      |
| 9 | 51 | Female | p.Pro369Ser/p.Arg408Gln                             | Abdominal pain, arthralgia, arthritis, myalgias, fever (38,5°C max.)                                                | Colchicine 500 mcg/24h                                              |

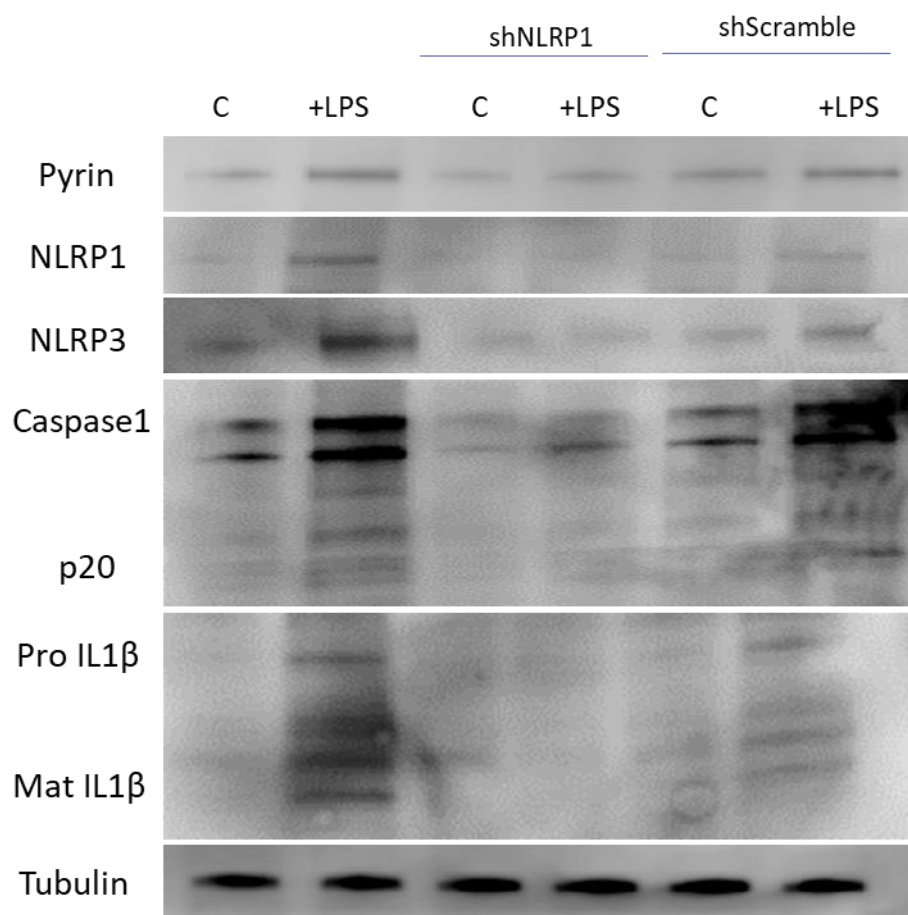

**Supplementary Figure 1.** NLRP1 siRNA positive and Scramble controls. THP-1 cells were treated with either NLRP1 or scramble siRNA (25 pmol siRNA plus 250  $\mu$ l Lipofectamine RNAiMAX per well in a six-well plate) for 72 hours. Following this, the cells were stimulated with LPS for 4 hours. Western blot analysis revealed a significant reduction in NLRP1 and related proteins in the respective siRNA-treated cells.

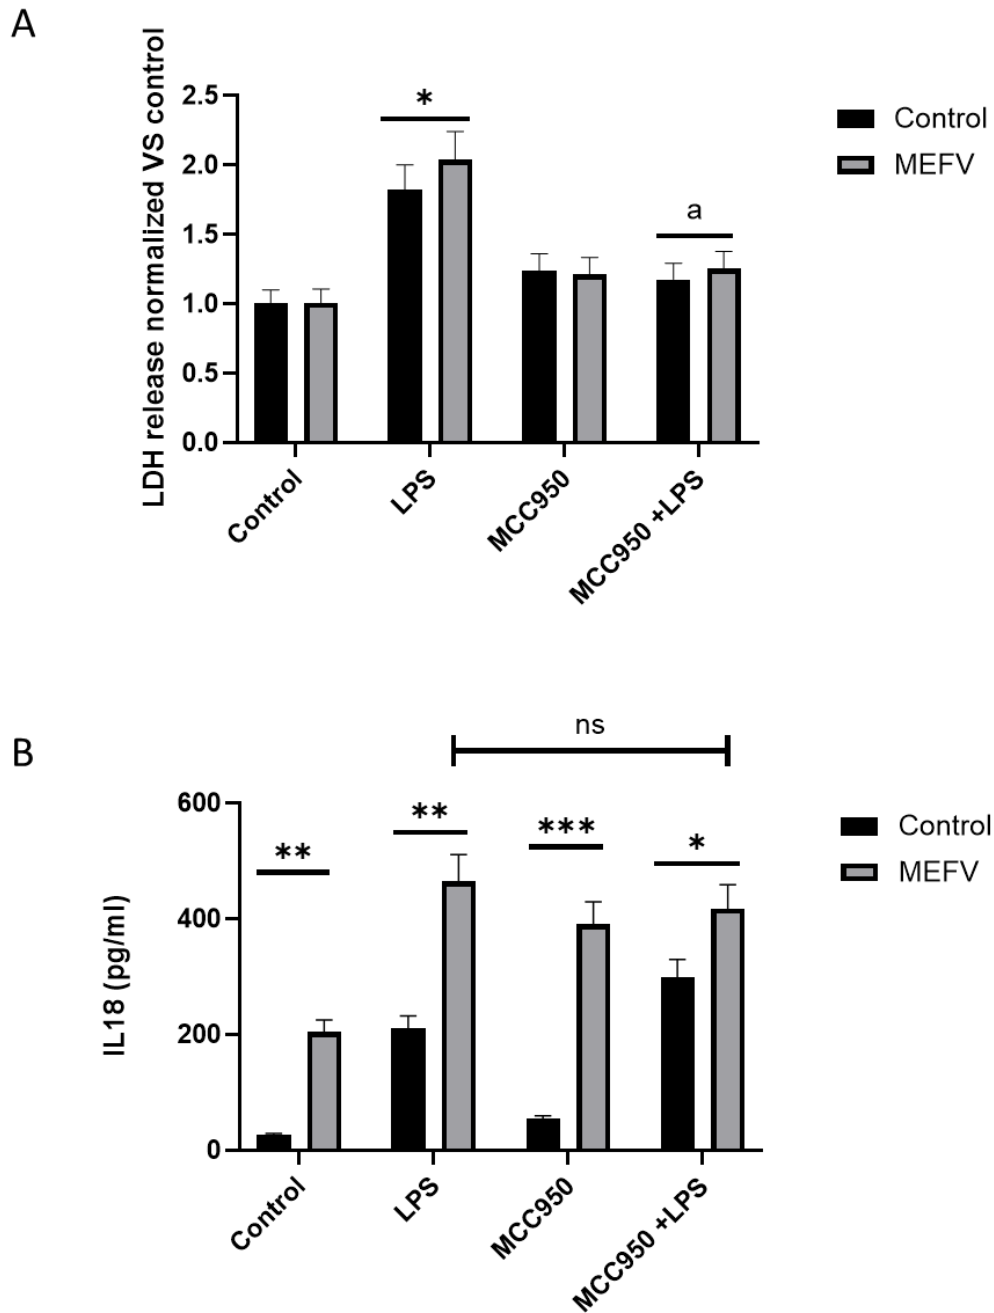

**Supplementary Figure 2. Effect of NLRP3 Inhibitor MCC950 on Patient-Derived PBMCs.**

Peripheral blood mononuclear cells (PBMCs) from patients were treated with the NLRP3 inhibitor MCC950 to assess its efficacy in the context of MEFV-related disease.

**A. LDH release following MCC950 treatment:** LPS stimulation resulted in elevated LDH release in both control and patient cells, which was mitigated by MCC950 treatment.

**B. IL-18 release levels measured by ELISA:** Cells with MEFV mutations exhibited high

baseline IL-18 release, which further increased following LPS stimulation or MCC950 treatment..\*  $p < 0.05$ , <sup>a</sup>  $p < 0.05$  (LPS *vs.* MCC950), ns = non-significant. Control samples were obtained from healthy subjects. n= 3

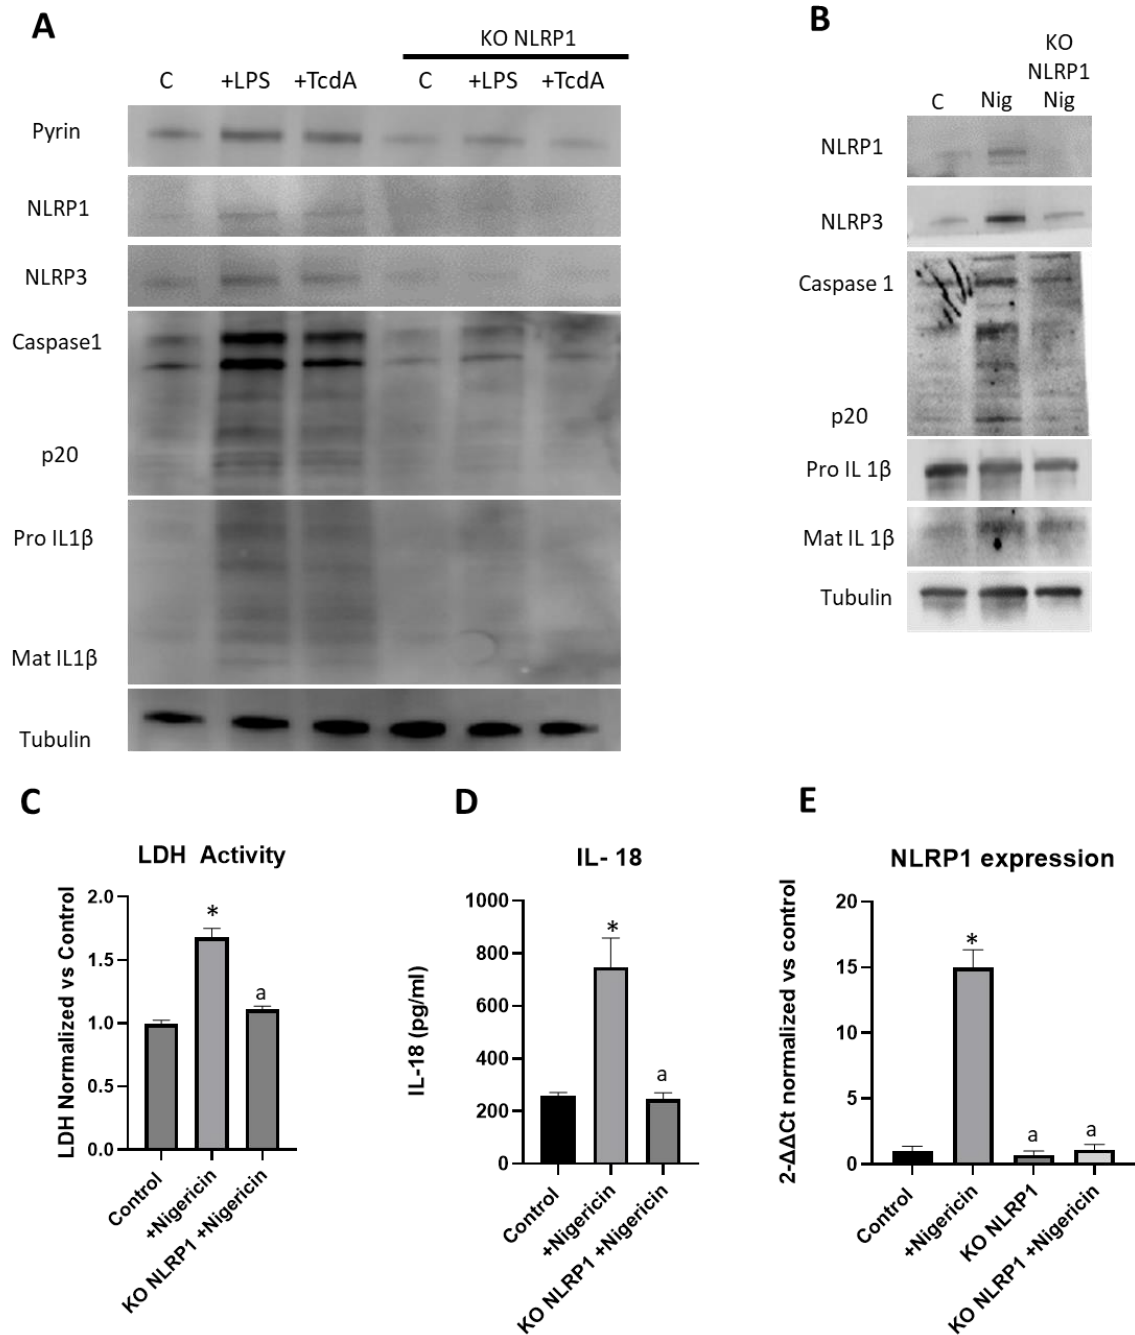

**Supplementary Figure 3.** NLRP1 CRISPR KO testing. THP1 cells were silenced according to the Materials and Methods section, then study stimulus (TcdA 100ng/ml for 3 hours or LPS at 1 mg/ml for 4 hours) were tested (A). Also, nigericin 10μl for 30' was used as strong NLRP1 and NLRP3 activator. NLRP1 KO reduced protein

expression (B), LDH release (C), IL-18 release (D) and NLRP1 mRNA expression (E).

\*  $p < 0.05$ , a  $p < 0.05$  (Nigericin vs. Nigericin+ KO NLRP1). n=3.
